# Supplementary material for: Dietary supplementation with N-carbamylglycinate (CGly) improved feed source proline absorption and reproductive performance in sows
Source: Royal Society of Chemistry journal article supplement (doi:10.1039/c9fo01940e), 2020-01-01
Supplement: c9fo01940e1.pdf [file c9fo01940e1.pdf]

Table S1 Primers for qRT-PCR

| Gene name          | Primers (5'-3')                                    | Length |
|--------------------|----------------------------------------------------|--------|
| β-actin            | F: CTGCGGCATCCACGAAACT<br>R: AGGGCCGTGATCTCCTTCTG  | 147    |
| SLC1A5             | F: GGGAGGTCTGGTCTCAGCTA<br>R: TCCGAAAAGCTCCAGACGAC | 274    |
| SLC6A20            | F: TGGTGGTGTCTTCTTCCTC<br>R: GTCATAGCCCGTGTGGTTG   | 134    |
| SLC15A1<br>(PEPT1) | F: TTCCTTCAGGCGCAAAAAGC<br>R: CACATAGGTAAACGCGCTGC | 110    |
| SLC38A2<br>(SNAT2) | F:CTGAGCAATGCGATTGTGGG<br>R:TGCCTTATGCCCCAGTTGTT   | 186    |

SLC1A5, solute carrier family 1 member 5; SLC6A20, solute carrier family 6 member 20;

SLC15A1(PEPT1), solute carrier family 15 member 1, also name as PepT1;

SLC38A2(SNAT2) , solute carrier family 38 member 2, also name as SNAT2.
